# Supplementary material for: Analysis of differences between different sheep breeds based on whole-genome resequencing technology
Source: Research Square preprint supplement (doi:10.21203/rs.3.rs-1732438/v1), 2022-06-21
Supplement: Supplementary file 1 [file 364ae893422dde6b530e7927.xlsx]

## Sheet: Sheet1
breeds	LD10	LD20	LD50	LD100	LD150	LD200	LD250	LD300
CHR	0.136	0.114	0.093	0.081	0.077	0.075	0.074	0.073
WZMQ	0.129	0.106	0.082	0.071	0.067	0.064	0.064	0.064
XQ	0.126	0.106	0.083	0.073	0.069	0.067	0.066	0.065
Table S2. Table of r2 values in LD analysis
